# Supplementary material for: Impact- and Thermal-Resistant Epoxy Resin Toughened with Acacia Honey
Source: Polymers (Basel). 2023 May 10;15(10):2261. doi: 10.3390/polym15102261 (PMC10222091; doi:10.3390/polym15102261)
Supplement: Supplementary file 1 [file polymers-15-02261-s001.zip › polymers-2360844-supplementary.pdf]

# Impact- and Thermal-Resistant Epoxy Resin Toughened with Acacia Honey

Ivana Stajcic <sup>1,\*</sup>, Filip Veljkovic <sup>1</sup>, Milos Petrovic <sup>2</sup>, Suzana Veličkovici <sup>1</sup>, Vesna Radojevic <sup>2</sup>, Branislav Vlahović <sup>3</sup>  
and Aleksandar Stajcic <sup>4</sup>

<sup>1</sup> Department of Physical Chemistry, “Vinča” Institute of Nuclear Sciences—National Institute of the Republic of Serbia, University of Belgrade, Mike Petrovića Alasa 12-14, P.O. Box 522, 11001 Belgrade, Serbia;

filipveljkovic@vin.bg.ac.rs (F.V.); vsuzana@vin.bg.ac.rs (S.V.)

<sup>2</sup> Faculty of Technology and Metallurgy, University of Belgrade, 11000 Belgrade, Serbia; mpetrovic@tmf.bg.ac.rs (M.P.); vesnar@tmf.bg.ac.rs (V.R.)

<sup>3</sup> Mathematics and Physics Department, North Carolina Central University, Durham, NC 27707, USA; vlahovic@nccu.edu

<sup>4</sup> Center for Microelectronic Technologies, Institute of Chemistry, Technology and Metallurgy—National Institute of the Republic of Serbia, University of Belgrade, 11000 Belgrade, Serbia; stajcic@nanosys.ihtm.bg.ac.rs

\* Correspondence: ivana\_r@vinca.rs

## S3. Results and discussion

### S3.1. FESEM analysis

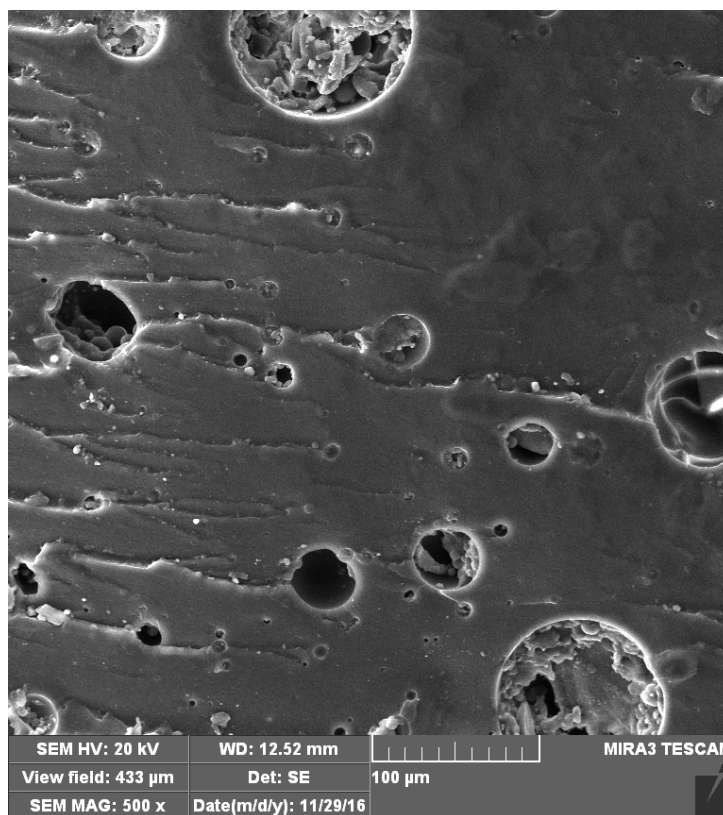

**Figure S1.** FESEM image of EH6.

*S3.2. Thermogravimetric analysis (TGA) and differential scanning calorimetry (DSC)*

Thermal analysis of epoxy was performed on a device for thermogravimetric analysis (TGA) in the temperature range from 24 °C to 500 °C (SDT Q600, TA instruments), under air, with heat rate set at 10 °C/min. DSC analysis was performed on a TA Instruments TA DSC Q10 calibrated with indium. The temperature range was from 30 °C to 250 °C with a heating rate of 10 °C/min and air flow of 50 mL/min. The samples were heated to 250 °C, held at 250 °C for 5 min to cancel the temperature history, and then cooled to 30 °C at the same cooling rate. Reheating to 250 °C was then carried out. The transformation temperature was determined as the midpoint of the initial transition slope of the curve.

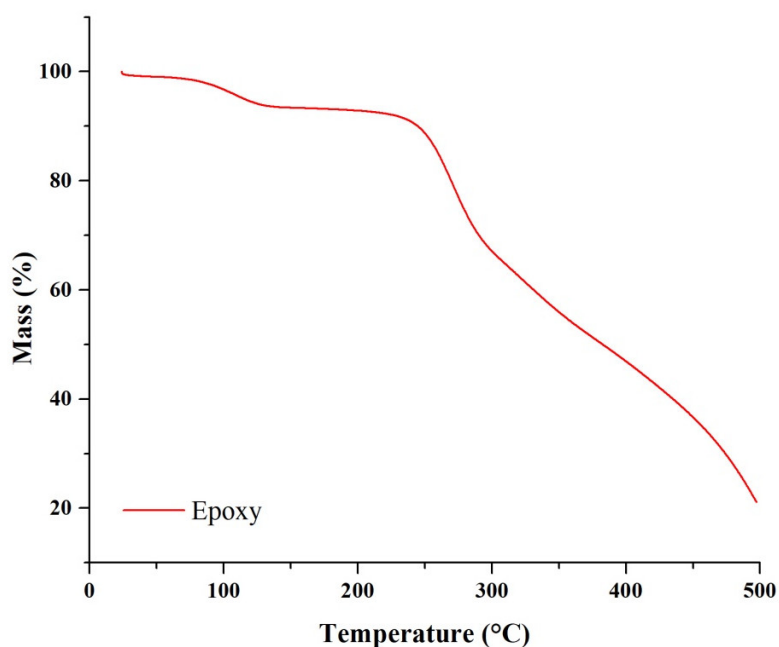

**Figure S2.** TGA curve for neat epoxy in air.

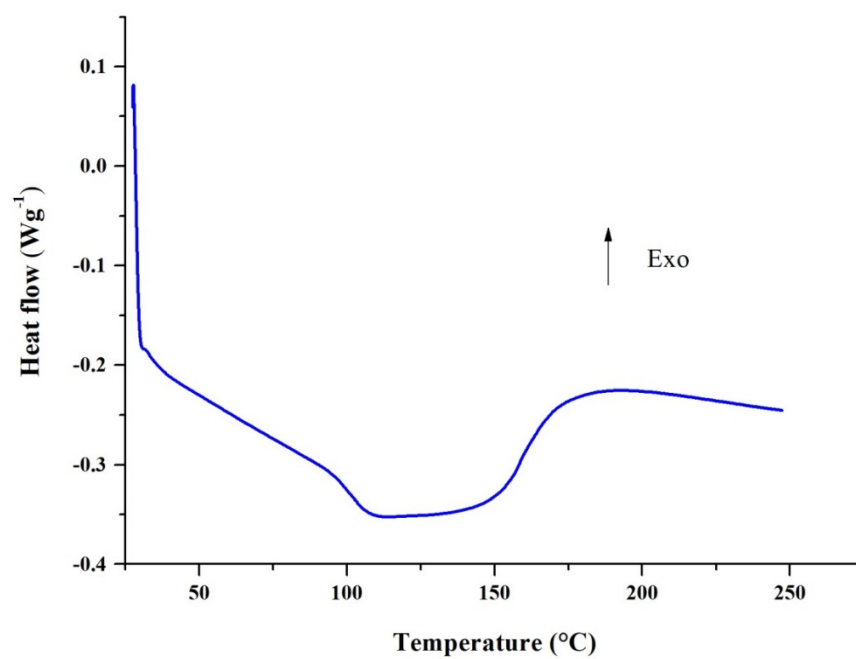

Figure S3. DSC curve for neat epoxy in air.
